# Supplementary material
Source: PubMed Central journal article supplement (PMC4180080)

Cumulative average target difficulty

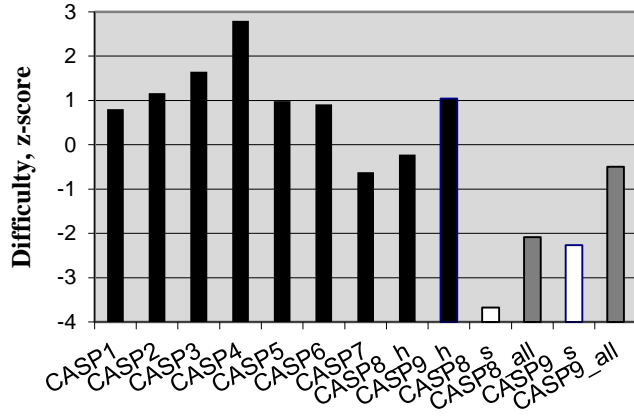

Supplement: NIHMS325344-supplement-Supp_Figure_S1.pdf [file NIHMS325344-supplement-Supp_Figure_S1.pdf]

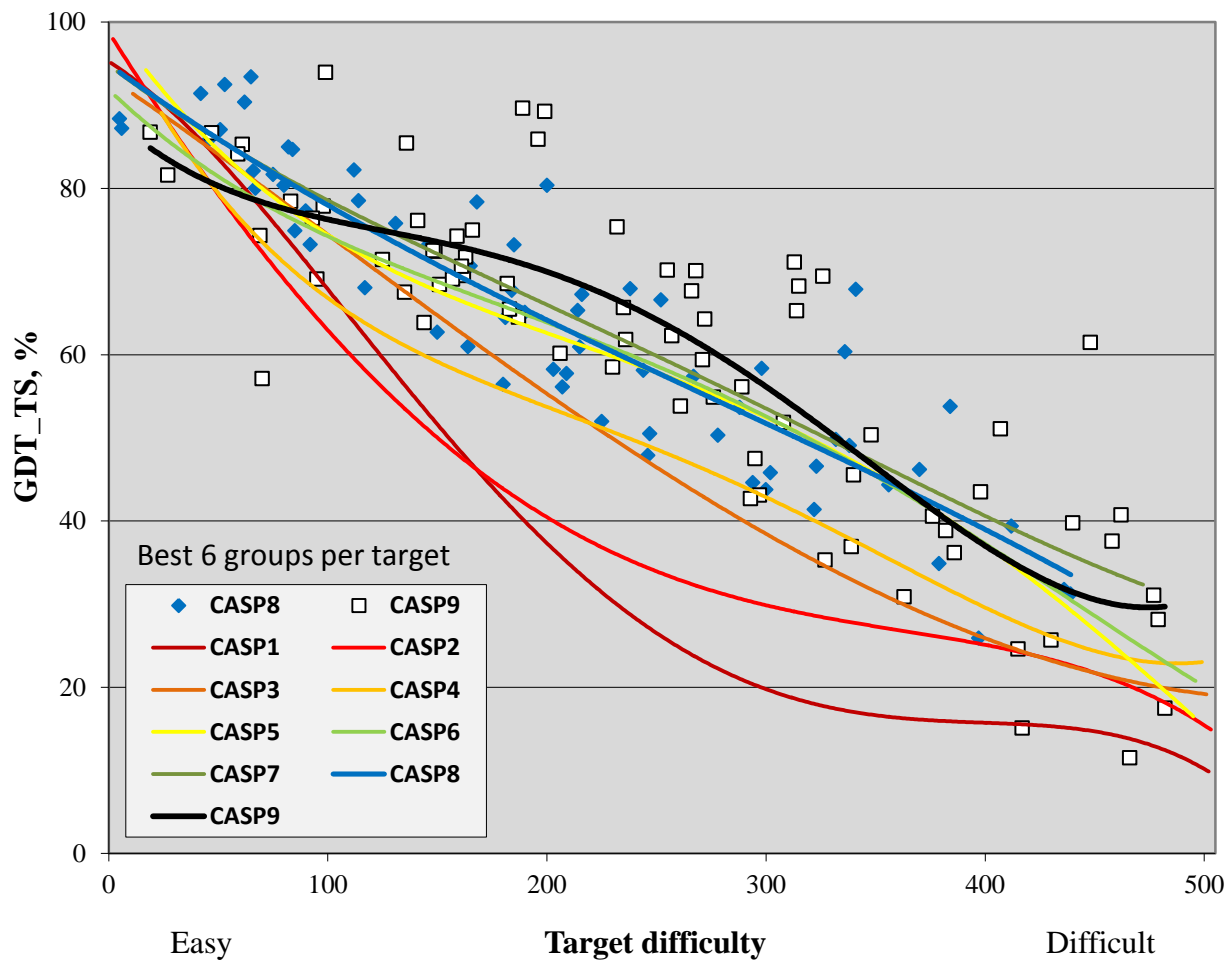

Supplement: NIHMS325344-supplement-Supp_Figure_S2.pdf [file NIHMS325344-supplement-Supp_Figure_S2.pdf]

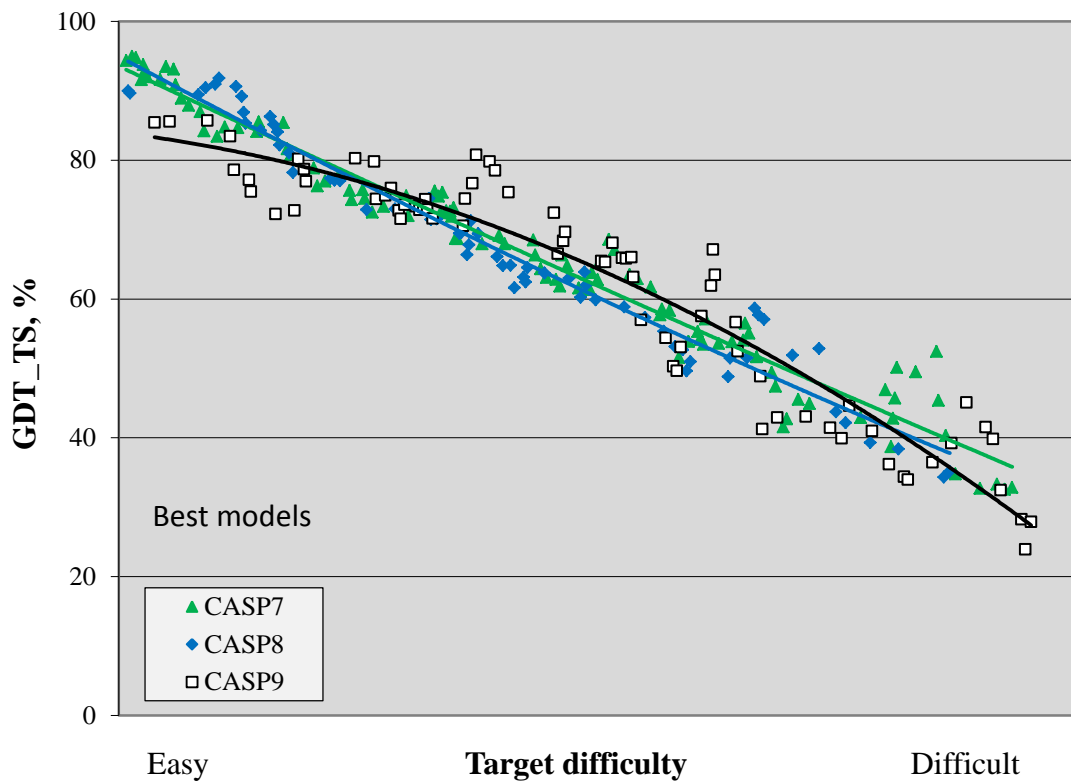

Supplement: NIHMS325344-supplement-Supp_Figure_S3.pdf [file NIHMS325344-supplement-Supp_Figure_S3.pdf]

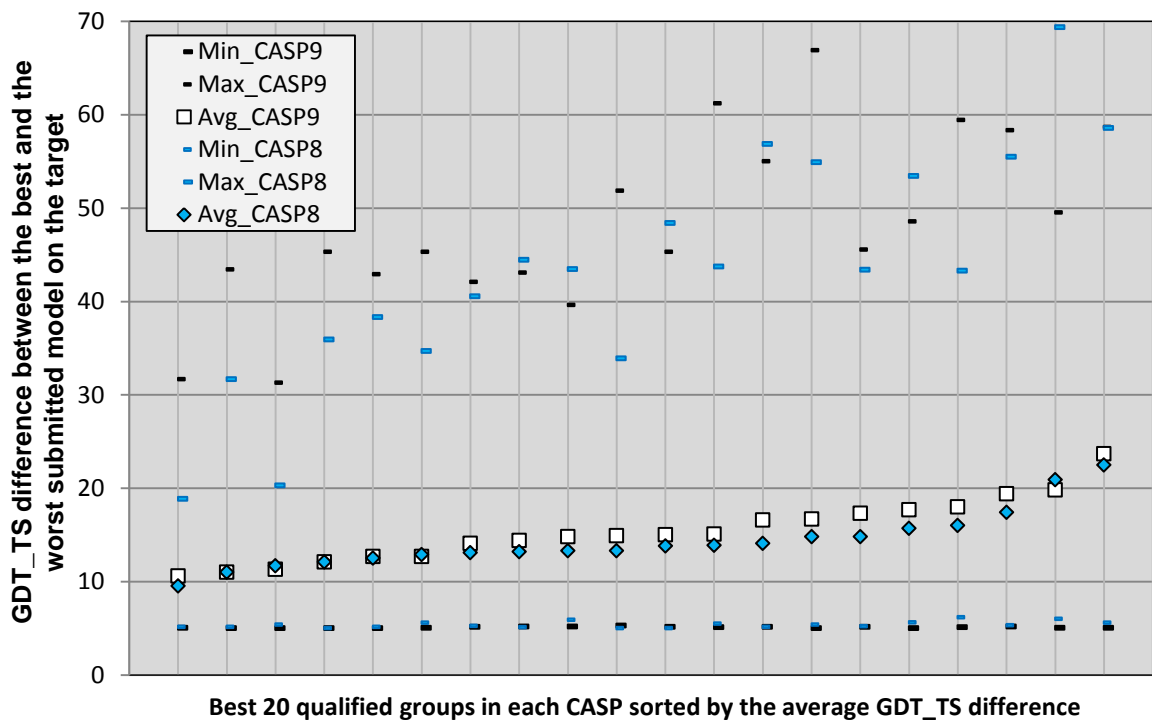

Supplement: NIHMS325344-supplement-Supp_Figure_S4.pdf [file NIHMS325344-supplement-Supp_Figure_S4.pdf]
